# Supplementary material for: Self-reported questionnaires assessing body perception disturbances in adults with chronic non-cancer pain: a scoping review
Source: Front Pain Res (Lausanne). 2025 Mar 6;6:1497328. doi: 10.3389/fpain.2025.1497328 (PMC11922727; doi:10.3389/fpain.2025.1497328)
Supplement: Supplementary file 2 [file Table2.xlsx]

## Sheet: Feuil1
			Table S1. Extraction table of included records
	Study identification
			Authors	Year	Country (where the study was conducted)	Title	Study Objectives	Study Type	Population	PROMs	Items	Other relevant info	Reference in which the supplementary article was found	Psychometric properties (psychometric studies only)
	1	a	Wand, Benedict Martin; James, Monique; Abbaszadeh, Sam; George, Pamela Jane; Formby, Pamela Margaret; Smith, Anne Julia; O'Connell, Neil Edward	2014	Australia	Assessing self-perception in patients with chronic low back pain: Development of a back-specific body-perception questionnaire	' To describe the development of a back-specific body-perception questionnaire and examine the psychometrics of this new scale.''	Questionnaire development and psychometric testing	51 Chronic low back pain (CLBP) patients and 51 healthy controls	Fremantle Back Awareness Questionnaire (FreBAQ)	9 items : 1.My back feels as though it is not part of the rest of my body 2. I need to focus all my attention on my back to make it move the way I want it to 3. I feel as if my back sometimes moves involuntarily, without my control 4.When performing everyday tasks, I don’t know how my back is moving 5.When performing everyday tasks, I am not always sure where my back is in space 6. I can’t percei…	Original study for the FreBAQ (English version)		Internal consistency: Cronbach's alpha = 0.777, indicating adequate internal consistency (deletion of item 9 increased alpha by 0.030); inter-item correlations ranged from 0.269 to 0.731; Known-groups validity: Patients with CLBP scored significantly higher on the FreBAQ than healthy controls (Mann Whitney test, p<0.001, median difference = 11); Construct validity: FreBAQ score was significantly …
	2	b	Erol, Erkan; Yildiz, Ayse; Yildiz, Ramazan; Apaydin, Umut; Gokmen, Derya; Elbasan, Bulent	2019	Turkey	Reliability and Validity of the Turkish Version of the Fremantle Back Awareness Questionnaire	''To develop the Turkish version of the Fremantle Back Awareness Questionnaire (FreBAQ-T) and to evaluate its psychometric properties''	Cross-cultural adaptation and psychometric testing	104 patients with CLBP	Turkish version of the Fremantle Back Awareness Questionnaire (FreBAQ-T)	[same items as the original FreBAQ]			Rasch analysis: all nine items fit the model, confirming the unidimensionality of the scale; High internal consistency (Cronbach.s alpha = 0.87 ; Person Separation Index = 0.82); good construct validity (correlation of the FreBAQ-T with: (a) duration of LBP: r=0.725; (b) LBP intensity at rest: r=0.582 and in motion: r=0.696; (d) Disability (RDQ): r=0.492; (e) Catastrophization (PCS): r=0.410; (f)…
	3	c	Janssens, Lotte; Goossens, Nina; Wand, Benedict M.; Pijnenburg, Madelon; Thys, Tinne; Brumagne, Simon	2017	Belgium	The development of the Dutch version of the Fremantle Back Awareness Questionnaire	''To perform a cross-cultural adaptation of the FreBAQ into Dutch''	Cross-cultural adaptation and psychometric testing	73 patients with LBP and 73 controls Test-retest reliability was assessed in a subgroup (n=48 with LBP and 48 controls)	Dutch version of the Fremantle Back Awareness Questionnaire (FreBAQ-D)	[same items as the original FreBAQ]			Cross-cultural adaptation: forward-backward translation and expert review achieved; face validity (n=22): comprehensibility and comprehenviseness deemed acceptable; structural validity (n=147): PCA suggests that the scale is unidimensional; internal consistency: Cronbach's alpha = 0.82 for LBP group (n=73) and 0.73 for the control group (n=73), indicating adequate internal consistency; test-retes…
	4	d	Schafer, Axel; Wand, Benedict M.; Ludtke, Kerstin; Ehrenbrusthoff, Katja; Schottker-Koniger, Thomas	2021	Germany	Validation and investigation of cross cultural equivalence of the Fremantle back awareness questionnaire - German version (FreBAQ-G)	'... to further investigate the psychometric properties of the FreBAQ-G, to evaluate its cross cultural validity in patients with chronic non-specific LBP and to explore potential relationships between body perception, pain, disability and back pain beliefs.''	Psychometric testing and cross-sectional observational study	272 patients with CLBP	German version of the Fremantle back awareness questionnaire (FreBAQ-G)	[same items as the original FreBAQ]			Test score reliability: Cronbach's alpha = 0.84; IRT-based test characteristics: the FreBAQ-G better discriminates people with higher back perception impairments (sum-score for people with an average level of back perception impairments = 7); item characteristics: discrimination values >1 for all 9 items (highest discrimination: item 4; lowest discrimination: item 9); differential item functionin…
	5	e	Beales, Darren; Lutz, Alison; Thompson, Judith; Wand, Benedict Martin; O'Sullivan, Peter	2016	Australia	Disturbed body perception, reduced sleep, and kinesiophobia in subjects with pregnancy-related persistent lumbopelvic pain and moderate levels of disability: An exploratory study	'To compare women experiencing no pain post-pregnancy with those experiencing pregnancy-related persistent lumbopelvic pain (either low- or high-level disability) across multiple biopsychosocial domains.''	Cross-sectional observational study	Women who were greater than or equal to 3 months postpartum. Three groups: a pain free group (n=26), and those with pregnancy-related, persistent PLPP that originated during pregnancy or within 3 weeks postpartum with low disability (n=12) and moderate disability (n=12)	Fremantle Back Awareness Questionnaire (FreBAQ)	9 items : 1.My back/pelvis feels as though it is not part of the rest of my body 2. I need to focus all my attention on my back/pelvis to make it move the way I want it to 3. I feel as if my back/pelvis sometimes moves involuntarily, without my control 4.When performing everyday tasks, I don’t know how my back/pelvis is moving 5.When performing everyday tasks, I am not always sure where my back/p…
	6	f	Ehrenbrusthoff, Katja; Ryan, Cormac G.; Gruneberg, Christian; Wand, Benedict M.; Martin, Denis J.	2018	Germany	The translation, validity and reliability of the German version of the Fremantle Back Awareness Questionnaire	''...to develop a German version of the FreBAQ (FreBAQ-G) and assess its test-retest reliability, its known-groups validity and its convergent validity with another purported measure of back perception.''	Cross-cultural adaptation and psychometric testing	35 patients with non-specific CLBP and 48 healthy participants	German version of the Fremantle Back Awareness Questionnaire (FreBAQ-G)	[same items as the original FreBAQ]	Original study for the German version of the FreBAQ		Cross-cultural adaptation: forward-backward translation and expert review achieved; face validity: comprehensibility and comprehensiveness deemed acceptable by both groups; Intra-observer reliability: ICC3.1 for agreement=0.88 and for consistency=0.89; Inter-observer reliability: ICC3.1 for agreement=0.88 and for consistency=0.90; Relationship to clinical status: FreBAQ-G score was significantly …
	7	g	Nishigami, Tomokiko; Mibu, Akira; Tanaka, Katsuyoshi; Yamashita, Yuh; Shimizu, Michele Eisemann; Wand, Benedict M.; Catley, Mark J.; Stanton, Tasha R.; Moseley, G. Lorimer	2018	Japan	Validation of the Japanese Version of the Fremantle Back Awareness Questionnaire in Patients with Low Back Pain	''... to develop a Japanese version of the FreBAQ (FreBAQ-J) and evaluate its psychometric properties in a sample of Japanese people with low back pain (LBP).''	Cross-cultural adaptation and psychometric testing	100 patients with LBP	Japanese version of the Fremantle Back Awareness Questionnaire (FreBAQ-J)	[same items as the original FreBAQ]	Original study for the Japanese version of the FreBAQ		Cross-cultural adaptation: forward-backward translation and expert review achieved; face validity (n=5): minor wording adjustments made following feedback on comprehensibility and completeness; Relationship to clinical status: FreBAQ-J was significantly correlated with pain in motion (rho=0.25), Rolland-Morris Disability Questionnaire (rho=0.36), Pain Catastrophizing Scale (rho=0.38), Tampa Scale…
	8	h	Rabey, Martin; Smith, Anne; Beales, Darren; Slater, Helen; O'Sullivan, Peter	2016	Australia	Differing psychologically derived clusters in people with chronic low back pain are associated with different multidimensional profiles	''To explore the existence of subgroups in a cohort with chronic low back pain (n=294) based upon data from multiple psychological questionnaires, and profile subgroups on data from multiple dimensions.''	Cross-sectionnal multidimensional profiling	294 CLBP patients	Fremantle Back Awareness Questionnaire (FreBAQ)	[same items as the original FreBAQ]
	9	i	Wand, Benedict Martin; Catley, Mark Jon; Rabey, Martin Ian; O'Sullivan, Peter Bruce; O'Connell, Neil Edward; Smith, Anne Julia	2016	Australia	Disrupted Self-Perception in People With Chronic Low Back Pain. Further Evaluation of the Fremantle Back Awareness Questionnaire	''...to present the outcomes of a comprehensive evaluation of the questionnaire’s psychometric properties and explore the potential relationships between body perception, nociceptive sensitivity, distress, and beliefs about back pain and the contribution these factors might play in explaining pain and disability''	Psychometric testing	251 patients with CLBP	Fremantle Back Awareness Questionnaire (FreBAQ)	[same items as the original FreBAQ]			Floor/ceiling effects: 6% registered minimum score and no person registered a max score, suggesting negligible ceiling and floor effects; Item hierarchy: appeared to progress in a coherent fashion, suggesting good construct validity; Targeting: average person agreeability: -0.96; SD: 0.84, range: -2.92 to 1.85. Unidimensionality: PCA suggests the scale is unidimensional (2.0 eigenvalue units). Pe…
	10	j	Shigetoh, Hayato; Nishi, Yuki; Osumi, Michihiro; Morioka, Shu	2020	Japan	Temporal Associations Between Pain-Related Factors and Abnormal Muscle Activities in a Patient with Chronic Low Back Pain: A Cross-Lag Correlation Analysis of a Single Case	To examine the temporal associations between pain related factors and muscle activity in patients with CLBP using a single-case analysis	Correlational case study	1 patient suffering from CLBP (LBP > 3 months)	Fremantle Back Awareness Questionnaire (FreBAQ) * Japanese version	[same items as the original FreBAQ]
	11	k	Yamashita, H.; Nishigami, T.; Mibu, A.; Tanaka, K.; Manfuku, M.; Fukuhara, H.; Yoshino, K.; Seto, Y.; Wand, B. M.	2019	Japan	Perceived Body Distortion Rather Than Actual Body Distortion Is Associated With Chronic Low Back Pain in Adults With Cerebral Palsy: A Preliminary Investigation	''...to investigate whether distorted body perception is a feature of the low back pain (LBP) experience in people with cerebral palsy (CP) and whether any distortions noted are confounded by the presence of motor and postural impairments commonly seen in CP''	Cross-sectional observational study	Total of 45 participants : - 15 CP patients with LBP - 15 CP patients without LBP - 15 patients without CP with LBP	Japanese version of the Fremantle Back Awareness Questionnaire (FreBAQ-J)	[same items as the original FreBAQ]
	12	l	Yamashita, Yuh; Nishigami, Tomohiko; Mibu, Akira; Tanaka, Katsuyoshi; Wand, Benedict M.; Catley, Mark J.; Higashi, Toshio	2021	Japan	Development and Psychometric Testing of the Japanese Version of the Fremantle Neck Awareness Questionnaire: A Cross-Sectional Study	''...to develop a Japanese version of a selfperception questionnaire specific to the neck and evaluate the validity and reliability of the scale using Rasch analysis.''	Questionnaire development and preliminary psychometric testing	100 patients with chronic neck pain and 56 healthy controls	Japanese Version of the Fremantle Neck Awareness Questionnaire (FreNAQ-J)	9 items: 1.My neck feels as though it is not part of the rest of my body 2. I need to focus all my attention on my neck to make it move the way I want it to 3. I feel as if my neck sometimes moves involuntarily, without my control 4.When performing everyday tasks, I don’t know how much my neck is moving 5.When performing everyday tasks, I am not sure exactly what position my neck is in 6. I can’t…	- Original study for the FreNAQ-J - The Fremantle Neck Awareness Questionnaire (FreNAQ-J) was developed by modifying the FreBAQ-J		The FreBAQ-J was adapted for the neck (the word "back" was replaced by "neck"). Differential Test Functioning: similar item hierarchy to that observed for the FreBAQ-J. Targeting: participants with low levels of disturbed body perception were not targeted well by the scale [average person agreeability: -1.82 logits; SD: 0.67, range: -1.34 to 0.88]. Category Order: categories 3 ("often") and 4 ("a…
	13	m	Goossens, Nina; Janssens, Lotte; Brumagne, Simon	2019	Belgium	Changes in the Organization of the Secondary Somatosensory Cortex While Processing Lumbar Proprioception and the Relationship With Sensorimotor Control in Low Back Pain	To investigate whether sensorimotor impairments in NSLBP patients (such as relying more on ankle proprioception than the back, slower performace at the sit-to-stand-to-sit test and perceptual imparments) relate to a reorganization of the primary and secondary somatosensory cortices (S1 and S2) and primary motor cortex (M1) during proprioceptive processing.	Cross-sectional observational study	15 patients with NSLBP and 13 controls	Dutch version of the Fremantle Back Awareness Questionnaire (FreBAQ-D)	[same items as the original FreBAQ]
	14	n	Mahmoudzadeh, Ashraf; Abbaszadeh, Sam; Baharlouei, Hamzeh; Karimi, Abdolkarim	2020	Iran	Translation and Cross-cultural Adaptation of the Fremantle Back Awareness Questionnaire into Persian language and the assessment of reliability and validity in patients with chronic low back pain	''...to translate, culturally adapt, and evaluate the reliability and validity of the Persian version of the FreBAQ''	Cross-cultural adaptation and psychometric testing	50 CLBP patients and 50 healthy controls	Persian version of the Fremantle Back Awareness Questionnaire (FreBAQ-P)	[same items as the original FreBAQ]	- Original study for the FreBAQ-P		Cross-cultural adaptation: forward-backward translation and expert review achieved; Floor/ceiling effects: 4% of CLBP participants (n=2) scored 0 and no participant scored 36 (maximum score); Test-Retest Reliability (n=25): ICC =0.96; Internal Consistency: acceptable (Cronbach's alpha =0.74). Absolute Reliability Measure: SEM =0.91; MDC =2.52; Discriminant Validity: significantly different scores…
	15	o	Nishigami, T.; Mibu, A.; Tanaka, K.; Yamashita, Y.; Yamada, E.; Wand, B. M.; Catley, M. J.; Stanton, T. R.; Lorimer Moseley, G.	2017	Japan	Development and psychometric properties of knee-specific body-perception questionnaire in people with knee osteoarthritis: The Fremantle Knee Awareness Questionnaire	''...to develop and assess the psychometric properties of a knee-specific version of the FreBAQ-J (FreKAQ-J), determine whether people with knee pain experience perceptual impairments and investigate the relationship between disturbed self-perception and clinical status.''	Questionnaire development and preliminary psychometric testing	65 people with knee OA	Japanese version of the Fremantle Knee Awareness Questionnaire (FreKAQ-J)	9 items : 1. My sore knee feels as though it is not part of the rest of my body 2. I need to focus all my attention on my sore knee to make it move the way I want it to 3. I feel as if my sore knee sometimes moves involuntarily 4. When performing everyday tasks, I don't know how much my sore knee is moving 5. When performing everyday tasks, I am not sure exactly what position my sore knee is in 6…	- Original study for the FreKAQ-J		The FreBAQ-J was adapted for the knee ("back" was replaced by "knee" and wording of item 9 was adapted to reflect a perceptual difference between sides). Item order: Similar to that of the FreBAQ-J. Differential Test Functioning: similar item hierarchy to that observed for the FreBAQ-J. Targeting: Participants with low levels of disturbed body perception were not targeted as well by the scale as …
	16	p	Monticone, Marco; Sconza, Cristiano; Portoghese, Igor; Nishigami, Tomohiko; Wand, Benedict M.; Sorrentino, Gregorio; Lemorini, Giulia; Respizzi, Stefano; Giordano, Andrea; Franchignoni, Franco	2021	Italy	Cross-cultural adaptation, reliability and validity of the Fremantle Knee Awareness Questionnaire in Italian subjects with painful knee osteoarthritis	''...to culturally adapt and validate the Italian version of the FreKAQ (FreKAQ-I), to allow for its use with Italian-speaking patients with painful knee OA.''	Questionnaire development and preliminary psychometric testing	102 subjects with painful knee OA	Italian version of the Fremantle Knee Awareness Questionnaire (FreKAQ-I)	[same items as the FreKAQ-J]	- Original study for the FreKAQ-I
	17	q	Nishigami, Tomohiko; Watanabe, Akihisa; Maitani, Toshiki; Shigetoh, Hayato; Mibu, Akira; Wand, Benedict Martin; Catley, Mark J.; Stanton, Tasha R.; Moseley, G. Lorimer	2021a	Japan	Development and validation of a shoulder-specific body-perception questionnaire in people with persistent shoulder pain	''... to develop a shoulder-specific self-perception questionnaire and evaluate the questionnaire in people with persistent shoulder pain.''	Questionnaire development and preliminary psychometric testing	112 subjects with persistent shoulder pain and 48 healthy controls	Japanese version of the Fremantle Shoulder Awareness Questionnaire (FreSHAQ-J)	9 items: 1. My sore shoulder feels as though it is not part of the rest of my body 2. I need to focus all my attention on my sore shoulder to make it move the way I want it to 3. I feel as if my sore shoulder sometimes moves involuntarily, without my control 4. When performing everyday tasks I don't know how much my sore shoulder is moving 5. When performing everyday tasks I am note sure exactly …	- Original study for the FreSHAQ-J		Questionnaire development: adaptation of the FreBAQ-J ('back' replaced by 'shoulder', item 9 rephrased to reflect perceptual differences between left and right). Rasch analyses performed to evaluate psychometric properties; Category order: visual analysis of Category Probability Curves suggests the Likert rating scale functions as expected; Targeting: mean agreeability = -1.21 logits (SD 0.81, ra…
	18	r	Lewis, J. S.; Schweinhardt, P.; Abdi, Abell Bouhassira Bruehl Bushnell Flor Flor Forderreuther Galer Galer Gandevia Geertzen Graziano Haggard Haggard Juottonen Lewis Lewis Lewis Longo Maihofner Maihofner Maihofner Mancini McCabe Medina Moberg Moseley Moseley Moseley Moseley Moseley Moseley Moseley Moseley Nunnally Peltz Perez Pleger Pleger Preston Rowbotham Schaefer Schwoebel Schwoebel Stanton-Hi…	2012	Canada	Perceptions of the painful body: The relationship between body perception disturbance, pain and tactile discrimination in complex regional pain syndrome	''...to test the hypotheses that (1) body perception disturbance is positively related to pain and (2) decreased tactile acuity is related to increased body perception disturbance.''	Cross-sectional observational study	22 patients suffering form CRPS type 1 in one upper limb and 22 healthy participants	Bath CRPS Body Perception Disturbance Scale (BPDS)	7 items : (total score comprised between 0 and 57) 1) On a scale of 0-10 how much a part of your body does the affected part feel? Very much a part = 0, Completely detached = 10 2) On a scale of 0-10 how aware are you of the physical position of your limb? Very aware = 0, Completely unaware=10 3) On a scale of 0-10 how much attention do you pay to your limb in terms of looking at it and thinking …
	19	s	Brun, Clementine; Giorgi, Nicolas; Pinard, Anne-Marie; Gagne, Martin; McCabe, Candida S.; Mercier, Catherine	2018	Canada	Exploring the Relationships Between Altered Body Perception, Limb Position Sense, and Limb Movement Sense in Complex Regional Pain Syndrome	''...to assess body perception and the senses of limb position and limb movement in complex regional pain syndrome (CRPS) and to test whether these variables are related to each other and to pain intensity''	Cross-sectional observational study	13 patients suffering from CRPS in one upper limb (type 1 and 2) and 13 healthy controls	Bath CRPS Body Perception Disturbance Scale (BPDS), French-Canadian version	5 items : 1) On a scale of 0-10 how much a part of your body does the affected part feel? Very much a part = 0, Completely detached = 10 2) On a scale of 0-10 how aware are you of the physical position of your limb? Very aware = 0, Completely unaware=10 3) On a scale of 0-10 how much attention do you pay to your limb in terms of looking at it and thinking about it? Full attention = 0, No attentio…	The French version of the Bath BPDS has not been validated yet.
	20	t	Bultitude, Janet H.; Walker, Ian; Spence, Charles	2017	England	Space-based bias of covert visual attention in complex regional pain syndrome	First aim: ''...to measure the distribution of covert attention of patients with CRPS to visual information presented in near space without vision of the hands, and on the surface of the hands Second aim: ''The second aim of the present study was to test which clinical or cognitive factors predict PSS values in patients with CRPS.'' Third aim: To verify '' the proposal that perception and action …	Cross-sectionnal experimental study	24 patients with CRPS exclusively or predominantly affecting one limb on one side of the body (UL: n=12, LL: n=12, type 1 and 2 included) and 24 healthy controls	Bath CRPS Body Perception Disturbance Scale (BPDS)	[Same items as the original BPDS]
	21	u	Hwang, Haesol; Cho, Sungkun; Lee, Jang-Han	2014	South Korea	The effect of virtual body swapping with mental rehearsal on pain intensity and body perception disturbance in complex regional pain syndrome	''...to investigate the effects of virtual body swapping with mental rehearsal on pain intensity and BPD in patients with CRPS''	Cross-sectionnal experimental study	39 patients with CRPS type 1 or 2 UL, LL or both	Modified nine-item Bath CRPS Body Perception Disturbance Scale (BPDS), Korean version	1) On a scale of 0-10 how much a part of your body does the affected part feel? Very much a part = 0, Completely detached = 10 2) On a scale of 0-10 how aware are you of the physical position of your limb? Very aware = 0, Completely unaware=10 3) On a scale of 0-10 how much attention do you pay to your limb in terms of looking at it and thinking about it? Full attention = 0, No attention=10 4) On…	The Korean version of the BPDS has not been validated.
	22	v	Kotiuk, Viktor; Burianov, Olexander; Kostrub, Olexander; Khimion, Ludmila; Zasadnyuk, Ivan	2019	Ukraine	The impact of mirror therapy on body schema perception in patients with complex regional pain syndrome after distal radius fractures	To investigate the effect of mirror therapy on body schema disturbances registered in complex regional pain syndrome type I (CRPS I) patients after distal radius fractures	Cross-sectionnal experimental study	30 patients with CRPS I due to distal radius fractures, treated with mirror therapy together with exercise therapy and medications. The control group consisted of 20 patients with CRPS I developed as a result of the distal radius fractures but only treated with exercises and medications	Bath CRPS Body Perception Disturbance Scale (BPDS), Ukrainian version	[Same as the original BPDS]	The Ukrainian version of the BPDS has not been validated.
	23	w	Lewis, Jennifer S.; Kellett, Sara; McCullough, Ryan; Tapper, Ashley; Tyler, Chelsey; Viner, Maria; Palmer, Shea	2019	England	Body Perception Disturbance and Pain Reduction in Longstanding Complex Regional Pain Syndrome Following a Multidisciplinary Rehabilitation Program	To evaluate changes in BPD following an multidisciplinary therapy (MDT) program in order to provide evidence for the effectiveness of this type of rehabilitation program.	''single-cohort study''	50 data sets of patients with CRPS, only 30 sets were analyzed (20 data sets had incomplete Bath BPDS)	Bath CRPS Body Perception Disturbance Scale (BPDS)	[Same as the original BPDS]
	24	x	Osumi, M.; Okuno, H.; Nishigami, T.; Ueta, K.; Morioka, S.	2015	Japan	Tactile localization training for pain, sensory disturbance, and distorted body image: a case study of complex regional pain syndrome	''...first, to compare the effects of TLT on the site of initial injury and secondary affected body site, and second, to observe the effects of TLT on sensory disturbance and distorted body image.'' *TLT=tactile localization training	Case study	One 43 year old woman with lower limb type 1 CRPS	Bath CRPS Body Perception Disturbance Scale (BPDS)	[Same as the original BPDS]
	25	y	Ryan, C. G.; King, R.; Robinson, V.; Punt, T. D.; Dinse, H. R.; Grunenberg, C.; Johnson, M. I.; Martin, D. J.	2017	England	Transcutaneous electrical nerve stimulation using an LTP-like repetitive stimulation protocol for patients with upper limb complex regional pain syndrome: A feasibility study	''...to (i) develop a clinical protocol using a long-term potentiation-like repetitive stimulation protocol for transcutaneous electrical nerve stimulation in patients with upper limb complex regional pain syndrome and (ii) develop a research protocol for a single-blind randomised controlled trial investigating the efficacy of transcutaneous electrical nerve stimulation for complex regional pain …	Randomized-controlled trial feasibility study	8 patients with upper limb type 1 CRPS were randomised to the TENS (n=6) or placebo TENS group (n=2). Only 4 participants provided data at the 3 months follow-up.	Bath CRPS Body Perception Disturbance Scale (BPDS)	[Same as the original BPDS]
	26	z	Vittersø, A. D.; Buckingham, G.; Halicka, M.; Proulx, M. J.; Bultitude, J. H.	2020	England	Altered updating of bodily and spatial representations after tool-use in complex regional pain syndrome	''...investigating the updating of body and peripersonal space representations following tool-use in people with and without CRPS.'' ''We also explored spatially defined modulations of hand temperature asymmetries, and any influence of updating bodily and spatial representations on this effect''	Cross-sectionnal experimental study	36 participants with unilateral type 1 or 2 CRPS (18 upper limb, 18 lower limb) and 36 pain-free controls	Bath CRPS Body Perception Disturbance Scale (BPDS)	[Same as the original BPDS]
	27	aa	Lewis, J. S.; Newport, R.; Taylor, G.; Smith, M.; McCabe, C. S.	2021	England	Visual illusions modulate body perception disturbance and pain in Complex Regional Pain Syndrome: A randomized trial	To verify if ''a match between the visual appearance and desired representation of the CRPS hand would normalize the maladapted central representation of the hand'' by using Mediated Virtual Reality (MVR)	Randomized controlled trial'	''45 participants with refractory upper-limb CRPS and body perception disturbance (BPD)'' divided into two subgroups: experimental (n=23) and control (n=22).	Bath CRPS Body Perception Disturbance Scale (BPDS)	[Same as the original BPDS]
	28	ab	Echalier, A.; Borg, C.; Creac'h, C.; Laurent, B.; Michael, G. A.	2020	France	Spontaneous sensations reveal distorted body perception in complex regional pain syndrome (CRPS)	To investigate the issue of SPS (spontaneus sensations) in CRPS by verifying if it would be more frequent and intense in CRPS patients	Cross-sectional observational study	20 right-handed patients with lower-limb CRPS and 20 right-handed healthy participants	Bath CRPS Body Perception Disturbance Scale (BPDS), French version	[Same as the original BPDS]	The French version of the BDPS has not been validated.
	29	ac	Schulte-Goecking, H.; Azqueta-Gavaldon, M.; Storz, C.; Woiczinski, M.; Fraenkel, P.; Leukert, J.; Azad, S. C.; Kraft, E.	2020	Germany	Psychological, social and biological correlates of body perception disturbance in complex regional pain syndrome	''This study addressed possible connections between BPD and psychological and social factors, pain intensity, and disease duration''	Cross-sectional observational study	60 patients with chronic CRPS type I of the hand	Bath CRPS Body Perception Disturbance Scale-German version (BPDS-G) Neurobehavioral Questionnaire-German adaptation	[BPDS: Same as the original scale] Neurobehavioral Questionnaire: see Galer&Jensen 1999 for the items. Item scoring: 7-point Likert scale	The cross-cultural adaptation study of the BPDS was published in German only (Tschopp et al., 2018).		Internal consistency: Bath BPDS-German: Cronbach's alpha = 0.79; Neurobehavioral Questionnaire-German: Cronbach's alpha = 0.88
	30	ad	Galer, B. S.; Jensen, M.	1999	United States	Neglect-like symptoms in complex regional pain syndrome: results of a self-administered survey	''to determine the frequency of neglect symptoms among patients with CRPS.''	Questionnaire development	224 patients with CRPS (LL or UL)	Neglect-like symptoms questionnaire (''Neurobehavioral Questionnaire'')	Yes/No scoring 1. If I don't focus my attention on my painful limb, it would lie still, like dead weight. 2. My painful limb feels as though it is not part of the rest of my body. 3. I need to focus all my attention on my painful limb to make it move the way I want it to. 4. My painful limb sometimes moves involuntarily. 5. My painful limb feels dead to me.	Original study for the Neurobehavioral Questionnaire. No validation process was undertaken.
	31	ae	Frettlöh, J.; Hüppe, M.; Maier, C.	2006	Germany	Severity and specificity of neglect-like symptoms in patients with complex regional pain syndrome (CRPS) compared to chronic limb pain of other origins	''assessed occurrence and extent of neglect-like symptoms in patients with CRPS'' and ''to to determine whether including of neglect-like symptoms in the diagnostic criteria for CRPS facilitates the clinical discrimination of CRPS from other painful limb diseases''	Descriptive study	CRPS (type 1 or 2) of the upper and lower limb (n = 123), control group with chronic limb pain of other origins (n = 117): arthrosis n=21; peripheral nerve lesion n=69; other peripheral diseases (e.g. polyneuropathy, chronic bursitis, enthesiopathy) n=27	Neglect-like Symptoms Questionnaire (''Neurobehavioral Questionnaire''), German version	Same items as the original scale. Item scoring: 7-point Likert scale compared to the original dichotomous scale.	Adapted from Galer & Jensen, 1999 and translated into German. Sensitivity, specificity, and internal consistency of the questionnaire were investigated.		Internal consistency: Cronbach's alpha = 0.86; Discriminant validity: participants with CRPS scored significantly higher than controls (effect size = 0.57); Sensitivity and specificity: Likert-scale values of 5 or more have a specificity of more than 90% but only 21.1% sensitivity at this score, whereas for the dichotomous (original) scale, agreeing to four or more items has a specificity of 67.5…
	32	af	Hayashi, K.; Nishiwaki, K.; Kako, M.; Suzuki, K.; Hattori, K.; Sato, K.; Kadono, I.; Nishida, Y.	2016	Japan	Combination of continuous epidural block and rehabilitation in a case of complex regional pain syndrome	To outline ''the rehabilitation course in the management of CRPS''	Case study	A 15-year-old girl with CRPS type 1 located in the LL	Neglect-like Symptoms Questionnaire (''Neurobehavioral Questionnaire''), Japanese version	Same items as the original scale. Item scoring: VAS scale (The distance (mm) from the left end of the 100-mm line was defined as the NLS score. Each score ranges from 0 to 200.)	No validation process was undertaken.
	33	ag	Hirakawa, Yoshiyuki; Hara, Michiya; Fujiwara, Akira; Hanada, Hirofumi; Morioka, Shu	2014	Japan	The relationship among psychological factors, neglect-like symptoms and postoperative pain after total knee arthroplasty	''To investigate the prevalence and association of neglectlike symptoms (NLS) and other psychological factors on postoperative pain in patients following total knee arthroplasty (TKA)''	Cross-sectional observational study	90 patients after total knee arthroplasty	Neglect-like Symptoms Questionnaire (''Neurobehavioral Questionnaire''), Japanese version	Same items as the original scale. Item scoring: VAS scale (The distance (mm) from the left end of the 100-mm line was defined as the NLS score. Each score ranges from 0 to 500.)	No validation process was undertaken.
	34	ah	Kuttikat, A.; Shaikh, M.; Oomatia, A.; Parker, R.; Shenker, N.	2017	England	Novel Signs and Their Clinical Utility in Diagnosing Complex Regional Pain Syndrome (CRPS)	''to validate these novel signs as simple bedside tests; assess their prevalence in chronic pain conditions; and to prospectively assess their clinical utility in identifying CRPS in a Fracture cohort. ''	''Prospective observationnal cohort study''	313 participants : - 60 healthy volunteers - 253 chronic pain patients (CRPS (n=49), FMS (n=50), RA (n=60), LBP (n=47) and fracture (n=47)) *Age: > or = 16 years old	Neglect-like Symptoms Questionnaire (''Neurobehavioral Questionnaire'')	Same items as the original scale. Item scoring: 7-point Likert scale.
	35	ai	Magni, Nicolo Edoardo; McNair, Peter John; Rice, David Andrew	2018	New Zealand	Sensorimotor performance and function in people with osteoarthritis of the hand: A case-control comparison	''To determine whether hand left/right judgements, tactile acuity, and body perception are impaired in people with hand OA. To examine the relationships between left right judgements, tactile acuity and hand pain. To explore the relationships between sensorimotor measures (left/right judgements and tactile acuity) and measures of hand function in people with hand OA''	Cross-sectional observational study	20 patients with symptomatic hand OA and 19 healthy controls	Neglect-like Symptoms Questionnaire (''Neurobehavioral Questionnaire'')	Same items as the original scale. Item scoring: 7-point Likert scale.
	36	aj	Kolb, Leonie; Lang, Christoph; Seifert, Frank; Maihofner, Christian	2012	Germany	Cognitive correlates of "neglect-like syndrome" in patients with complex regional pain syndrome	''to further examine visual perception of the extrapersonal space and the presence of a potential parietal lobe dysfunction'' in CRPS	Cross-sectional observational study	20 UL CRPS (type 1 and 2) patients 20 normal control participants (healthy) and 20 pain control participants (e.g. carpal tunnel syndrome, rheumatoid arthritis, arthrosis, and other types of pain in the UL).	Neglect-like Symptom Questionnaire ("Neurobehavioral Questionnaire"), German version	Same items as the original scale. Item scoring: 7-point Likert scale.
	37	ak	Michal, Matthias; Adler, Julia; Reiner, Iris; Wermke, Andreas; Ackermann, Tatiana; Schlereth, Tanja; Birklein, Frank	2017	Germany	Association of Neglect-Like Symptoms with Anxiety, Somatization, and Depersonalization in Complex Regional Pain Syndrome	''to analyze whether NLS in CRPS might be related to depersonalization, but also to pain, disability, and other psychological symptoms like depression, anxiety, and somatization.''	Cross-sectional observational study	50 patients with CRPS (type 1 and 2, UL and LL ) and 45 pain control patients (27 chronic limb pain, 18 migraine headache)	Neglect-like Symptom Questionnaire ("Neurobehavioral Questionnaire"), German version	Same items as the original scale. Item scoring: 7-point Likert scale.
	38	al	Reinersmann, Annika; Landwehrt, Julia; Krumova, Elena K.; Peterburs, Jutta; Ocklenburg, Sebastian; Gunturkun, Onur; Maier, Christoph	2013	Germany	The rubber hand illusion in complex regional pain syndrome: preserved ability to integrate a rubber hand indicates intact multisensory integration	To investigate ''higher order multisensory integration of body-relevant stimuli using the rubber hand illusion in CRPSpatients.''	Cross-sectionnal experimental study	CRPS (type 1, UL) patients (n = 24), patients with upper limb pain of other origin (n = 21, clinical control group), and healthy subjects (n = 24).	Neglect-like Symptom Questionnaire ("Neurobehavioral Questionnaire"), German version	Same items as the original scale. Item scoring: 7-point Likert scale.
	39	am	Wittayer, M.; Dimova, V.; Birklein, F.; Schlereth, T.	2018	Germany	Correlates and importance of neglect-like symptoms in complex regional pain syndrome	''to assess the importance of NLS for patient outcome and to explore their clinical correlates.''	Cross-sectional observational study	53 patients with CRPS (type 1 and 2, UL and LL, acute and chronic ) and 28 healthy volunteers	Neglect-like Symptom Questionnaire ("Neurobehavioral Questionnaire"), German version	Same items as the original scale. Item scoring: 7-point Likert scale.
	40	an	Dagsdottir, L. K.; Skyt, I.; Vase, L.; Baad-Hansen, L.; Castrillon, E.; Svensson, P.	2016	Denmark	Reports of perceptual distortion of the face are common in patients with different types of chronic oro-facial pain	To investigate ''whether chronic oro-facial pain patients experience perceptual distortions – a kind of body image disruption.''	Descriptive study	60 chronic oro-facial pain patients	Magnitude Estimation Scale (MES)-Danish	1-question subjective scale: (answer range from -100% to +100%) "Do the concerned regions feel larger (swollen), smaller, or exactly the same size as the unaffected left side of the face?"
	41	ao	Giummarra, Melita J.; Georgiou-Karistianis, Nellie; Nicholls, Michael E. R.; Gibson, Stephen J.; Chou, Michael; Bradshaw, John L.	2010	Australia	Corporeal awareness and proprioceptive sense of the phantom	'while various studies have reported aspects of somatic and proprioceptive qualities that characterize phantom limbs, we aimed to systematically explore these phenomena in a large cohort of amputees.''	Descriptive study	283 amputees	Changes in Body Sensation Following Limb Loss questionnaire (CIBS-questionnaire)	Items pertaining to poby perception disturbances: Phantom limb perception: 18. Since the loss of your limb, have you perceived the presence of a phantom limb? _ No / _ Yes, Ia have experienced phantom sensations: _ an awareness of the presence of a phantom; _the sensation of a normal phantom limb that is not painful and sits in a normal body position; _a painful phantom limb; _a "deformed" phanto…	CIBS-questionnaire was developped for this study
	42	ap	Mibu, Akira; Nishigami, Tomohiko; Uematsu, Hironobu; Tanaka, Katsuyoshi; Shibata, Masahiko; Matsuda, Yoichi; Fujino, Yuji	2021	Japan	Validation of the Japanese version of the Bath CRPS Body Perception Disturbance Scale for CRPS	To develop a Japanese version of the BPDS (BPDS-J) and to investigate the validity of this scale in Japanese patients with CRPS.'	Cross-cultural adaptation and psychometric testing	22 patients with CRPS (14 women, mean age: 46.1±16.2 years old, duration of the symptom: 7.9±29.5 months (1-120 months))	Bath CRPS Body Perception Disturbance Scale - Japanese version (BPDS-J)	[Same as the original BPDS]			Cross-cultural adaptation: forward-backward translation and expert review achieved; Internal Consistency: good (Cronbach's alpha = 0.73); Correlations with clinical status: BPDS-J was significantly correlated with TPD ratio (r=0.65, p<0.01) and TSK (r=0.51, p<0.05), but not with other clinical outcomes (pain intensity and interference, duration of symptoms).
	43	aq	Beisheim-Ryan, E.H.; Hicks, G.E.; Pohlig, R.T.; Medina, J.; Sions, J.M.	2022	United States	Body image and perception among adults with and without phantom limb pain	To investigate whether adults with PLP demonstrate impaired body image and perception as compared to peers without PLP and to determine whether body image and perception are associated with PLP characteristics.	Cross-sectional observational study	72 adults with lower limb loss; 30 without PLP (12 women; mean age: 55±13 years old; median time since amputation: 9 years (25th percentile: 3 years; 75th percentile: 26 years); 42 with PLP (19 women; mean age: 54±13 years old; median time since amputation: 9 years (25th percentile: 4 years; 75th percentile: 20 years)	Bath CRPS Body Perception Disturbance Scale (BPDS)	[Same as the original BPDS]	Original BPDS item #5 was rephrased to ascertain perceptual differences in phantom limb size, temperature, pressure, and weight, as compared to the intact limb. If differences were perceived, participants were asked to elaborate using text entry.
	44	ar	Halicka, M.; Vittersø, A.D.; Proulx, M.J.; Bultitude, J.H.	2021a	United Kingdom	Attention upturned: Bias toward and away from the affected side of the body and near space in a case of complex regional pain syndrome	To gain a better understanding of the mechanisms through which attention can come to be altered in CRPS and the extent to which they resemble known conditions such as neglect.	Case study	63 years old woman with CRPS of the left arm (8 years since diagnosis).	Bath CRPS Body Perception Disturbance Scale (BPDS)	[Same as the original BPDS]
	45	as	Haslam, B.S.; Butler, D.S.; Moseley, G.L.; Kim, A.S.; Carey, L.M.	2022	Australia, United States	"My Hand Is Different": Altered Body Perception in Stroke Survivors with Chronic Pain	(a) To determine if individuals with sub-acute and chronic stroke who experience chronic pain are more likely to report changes in body perception than stroke survivors without pain. (b) If so, to determine whether this is related to the pain affected region.	Cross-sectional observational study	523 chronis stroke survivors; '- No pain group (n=199; 86 women; average age: 59±14 years) '- Chronic pain group (n=324; 182 women; average age: 58±13 years) - Participants reporting pain including hand (n=141) - Participants reporting pain excluding hand (n=183)	Perceived Hand Size Question (single question)	"Since your stroke, does it feel like your hand is now a different size?" Yes/No If the participant responded "yes", follow-up question: Does your hand now feel bigger or smaller?
	46	at	Hedayati, R.; Amjadian, F.; Ebadi, A.; Ehsani, F.	2022	Iran	Cross-cultural adaptation, validity and reliability of the Persian version of Fremantle Knee Awareness Questionnaire	To cross-culturally adapt the FreKAQ into Persian, and to evaluate the reliability and validity of the FreKAQ-P in patients with chronic knee OA.	Cross-cultural adaptation and psychometric testing	312 adults with chronic knee osteoarthritis (159 women; 58% aged between 40-60 years old, 42% aged betweem 61-80 years old)	Fremantle Knee Awareness Questionnaire-Persian version (FreKAQ-P)	Same items as other versions of the FreKAQ.			Cross-cultural adaptation: forward-backward translation and expert review achieved; Face validity (n=10); minor word changes were made following cognitive interviews with OA participants; Structural Validity: based on the results of EFA and CFA, item 8 was deleted and a 3-factor model emerged (factor 1: Reduced Accuracy of Proprioceptive Acuity [items 4-6]; factor 2: Self-perceived Knee Shape and…
	47	au	Hu, F.; Liu, C.; Cao, S.; Wang, X.; Liu, W.; Li, T.; Yang, X.; Zhang, X.	2022	China	Cross-cultural adaptation and validation of the simplified chinese version of the Fremantle back awareness questionnaire in patients with low back pain	To translate and cross-culturally adapt the Fremantle back awareness questionnaire (FreBAQ) into a Simplified Chinese version (FreBAS-C), and evaluate the reliability and validity of the FreBAQ-C in patients with non-specific chronic low back pain (CLBP).	Cross-cultural adaptation and psychometric testing	105 participants with non-specific CLBP (average age: 54.1±15.6 years; 67 female).	Fremantle Back Awareness Questionnaire - Chinese version (FreBAQ-C)	Same items as the original FreBAQ			No floor/ceiling effects; Excellent internal consistency (Cronbach's alpha = 0.833); Good test-retest reliability (ICC=0.897, 95% confidence interval: 0.852-0.929); limits of agreement ranged from -5.8 to 6.3; SEM=2.16 and MDC=5.99; Construct validity confirmed by moderate correlations of the FreBAQ-C and VAS during motion (r=0.274, p=0.005) and rest (r=0.243, p=0.012), and fair correlations of t…
	48	av	Magni, N.; Collier, J.; McNair, P.; Rice, D.A.	2021	New Zealand	Neuropathic Pain in Hand Osteoarthritis: A Cross-Sectional Study	(a)To assess the prevalence of neuropathic pain (NP) in people with hand OA and to determine whether pain intensity, pain interference, number of pain medications, hand function, neglect-like symptoms, psychological distress, and sleep quality are differentially associated with the presence of NP. (b) To assess the relationship between pain intensity, neglect-like symptoms, and the number of anal…	Cross-sectional observational study	121 participants with hand OA. NP group: n=51 (45 females, average age: 69.3±11.7 years) Non-NP group: n=70 (60 females, average age: 10±8.5 years)	Neglect-like symptoms questionnaire (''Neurobehavioral Questionnaire'')	Same items as the original scale. Item scoring: 7-point Likert scale.
	49	aw	Meier, R.; Emch, C.; Gross-Wolf, C.; Pfeiffer, F.; Meichtry, A.; Schmid, A.; Luomajoki, H.	2021	Switzerland	Sensorimotor and body perception assessments of nonspecific chronic low back pain: a cross-sectional study	To determine whether back-photo assessment (BPA), two-point discrimination (TPD) and movement control tests (MCT), which are thought to reflect sensorimotor changes, (are) able to discriminate between subjects with nonspecific CLBP and altered body perception and health controls.	Cross-sectional observational study	30 participants with nonspecific CLBP (15 female, average age: 52.9±18.0 years) and 30 healthy controls (15 female, average age: 51.8±16.5 years)	Fremantle Back Awareness Questionnaire - German version (FreBAQ-G)	Same items as the original FreBAQ
	50	ax	Rao, P.B.; Jain, M.; Barman, A.; Bansal, S.; Sahu, R.N.; Singh, N.	2021	India	Fremantle Back Awareness Questionnaire in Chronic Low Back Pain (FreBAQ-I): Translation and Validation in the Indian Population	To translate the questionnaire into a classical Indian language (Odiya) and to establish the psychometric ability of the questionnaire in the Indian context.	Cross-cultural adaptation and psychometric testing	100 participants with CLBP (50 female, average age: 42.72±11.59 years)	Fremantle Back Awareness Questionnaire - Indian version (FreBAQ-I)	Same items as the original FreBAQ			Relationship to clinical status: fair correlation between FreBAQ-I and pain duration (r=0.35, p<0.001), moderate correlations with pain intensity (r=-0.19, p<0.04) and with depression score (r=0.25, p=0.012). Rasch analysis: category order: average fit statistics and agreeability measure, reflecting adequate category structure. Excellent internal consistency (Cronbach's alpha = 0.91).
	51	ay	Reinersmann, A.; Skinner, I.W.; Lucke, T.; Masse-Westropp, N.; Rudolf, H.; Moseley, G.L.; Stanton, T.R.	2021	Australia	Intact tactile anisotropy despite altered hand perception in complex regional pain syndrome: rethinking the role of the primary sensory cortex in tactile and perceptual dysfuntion	To investigate tactile anisotropy in people with CRPS, in people with non-CRPS hand pain and in pain-free controls and to explore the relationship between assessments of tactile anisotropy and hand perception.	Cross-sectional observational study	14 participants with upper-limb CRPS type 1 (12 female, average age: 47.6±12.6 years, current pain: 4.4±2.3), 15 participants with upper-limb pain of other origin [carpal tunnel n=1; chronic pain following soft tissue injury n=2; RA n=10; OA n=2](13 female, average age: 58.7±17.1 years, average pain: 4.1±2.1), 19 healthy participants (9 female, average age: 36.7±14.5 years).	Bath CRPS Body Perception Disturbance Scale (BPDS) Neglect-like symptoms questionnaire (''Neurobehavioral Questionnaire'')	BPDS: Same items as the original scale. Neurobehavioral Questionnaire: Same items as the original scale. Item scoring: 7-point Likert scale.
	52	az	Steenken, L.; Conde, R.M.; Müller, J.K.; Escolano-Lozano, F.; Birklein, F.; Dimova, V.	2023	Germany	Nociceptive two-point discrimination acuity and body representation failure in polyneuropathy	To investigate pain thresholds and 2ptD for painful stimuli at different body site, and to assess limb perception in healthy controls (HC) vs. PNP patients.	Pilot study	20 participants with painful and non-painful polyneuropathy (11 men, mean age: 57.6±13.9 years), 20 healthy controls 9 men, mean age: 50.6±4.6 years)	Bath CRPS Body Perception Disturbance Scale (BPDS) - German version	Same items as the original scale. Slight change of item wording ("affected limb" replaced by "feet").	Forward-bacward translation from English to German completed for this study.
	53	ba	Tanaka, S.; Nishigami, T.; Ohishi, K.; Nishikawa, K.; Wand, B.M.; Stanton, T.R.; Yamashita, H.; Mibu, A.; Tokunaga, M.; Yoshimoto, T.; Ushida, T.	2021	Japan	"But it feels swollen!": the frequency and clinical characteristics of people with knee osteoarthritis who report subjective knee swelling in the absence of objective swelling	To investigate how frequently people with knee osteoarthritis (OA) complain of swelling without objective evidence of swelling, and describe the clinical characteristics of this population.	Descriptive study	46 participants with knee OA; Subjective swelling only: n=15 (15 women, mean age: 69.9@10.4 years). Subjective and objective swelling: n=15 (14 women, mean age: 70.2±7.4 years). No swelling: n=16 (12 women, mean age: 66.0±8.1 years).	Fremantle Knee Awareness Questionnaire-Japanese version (FreKAQ-J)	Same items as the original FreKAQ-J
	54	bb	Ten Brink, A.F.; Halicka, M.; Vittersø, A.D.; Keogh, E.; Bultitude, J.H.	2021a	United Kingdom	Ignoring space around a painful limb? No evidence for a body-related visuospatial attention bias in complex regional pain syndrome	To evaluate visuospatial attention bias in CRPS in tasks that are designed to recruit body representation to different degrees.	Cross-sectional observational study	40 participants with CRPS type 1 or 2 '- 20 upper-limb; 18 female, mean age: 53.75±11.32 years, pain duration: 7.21±4.41 years '- 20 lower-limb; 16 female, mean age: 46.25±11.75 years, pain duration: 8.31±11.13 years 40 participants with chronic limb pain '- 20 upper-limb: 15 female, mean age: 34.80±15.87, pain duration: 4.98±6.45 years '- 20 lower-limb: 11 female, mean age: 42.70±19.77 years, pa…	Bath CRPS Body Perception Disturbance Scale (BPDS)	Same items as the original scale.
	55	bc	Ten Brink, A.F.; Bultitude, J.H.	2021b	United Kingdom	Predictors of self-reported neglect-like symptoms and involuntary movements in complex regional pain syndrome compared to other chronic limb pain conditions	(a) To identify the components of the five-item Neurobehavioral questionnaire; (b) to assess their internal consistency; (c) to compare them between respondents who reported as having received a diagnosis of CRPS and respondents with other chronis limb pain; (d) to assess potential predictors; (e) to explore whether they relate to specific CRPS symptoms.	Psychometric testing and cross-sectional observational study	335 participants with CRPS (297 female, mean age: 46.64±12.08 years, pain duration: 8.80±8.32 years) 407 participants with chronic limb pain other than CRPS (363 female, mean age: 46.36±13.65 years, pain duration: 12.28±10.71 years)	Neglect-like symptoms questionnaire (''Neurobehavioral Questionnaire'')	Same items and scoring as the original scale (Galer&Jensen, 1999)			Dimensionality: PCA revealed 2 components: component 1 is "motor and cognitive neglect-like symptoms" (items 1,2,3,5), component 2 is "involuntary movements" (item 4). Internal consistency: acceptable for component 1 (Cronbach's alpha = 0.76). N/A for component 2.
	56	bd	Ten Brink, A.F.; Halicka, M.; Vittersø, A.D.; Jones, H.G.; Stanton, T.R.; Bultitude, J.H.	2021c	United Kingdom	Validation of the Bath CRPS Body Perception Disturbance Scale	To assess the following aspects of the English B-CRPS-BPDS: (a) internal consistency; (b) know group validity; (c) construct validity; (d) independent associations with demographic and clinical variables (age, sex, handedness, affected side, affected limb, disease duration, pain intensity, CRPS severity score, fear of movement, UL disability, mood states); (e) consistent changes in body perceptio…	Psychometric testing	Data pooled from 8 studies: n=114 participants with CRPS type 1 or 2 affecting the UL or LL (93 female, mean age: 46.06±13.52 years, disease duration: 5.60±6.41 years) n=69 pain-free controls (55 female, mean age: 46.61±14.37 years)	revised Bath CRPS Body Perception Disturbance Scale Neglect-like symptoms questionnaire (''Neurobehavioral Questionnaire'')	BPDS: same items as the original scale, except for item 3 ("How much attention do you pay to your limb…") which showed the lowest item-total correlation (CRPS group: 0.34) ans was therefore removed from the revised BPDS. Neurobehavioral Questionnaire: Same items as the original scale. Item scoring: 7-point Likert scale.			Internal Consistency: Original scale: acceptable (Cronbach's alpha >0.70). Revised scale (without item 3): good (Cronbach's alpha >0.80) Known group validity (revised scale): People with CRPS had higher scores than pain-free controls on all items (except item 3) and the revised total score with large effect sizes for items 1,4,5,7 and total score, and medium effect sizes for items 2 and 6b. Const…
	57	be	Toda, H.; Maruyama, T.; Fujita, K.; Yamauchi, Y.; Tada, M.	2021	Japan	Self-Perception of the Knee Is Associated with Joint Motion during the Loading Response in Individuals with Knee Osteoarthritis: A Pilot Cross-Sectional Study	To investigate the relationship between knee joint excursion in the loading response while walking at a confortable and fast walking speed and the self-perception of the knee in individuals with knee OA.	Cross-sectional observational study	21 adults with knee OA (17 female, mean age: 72.1±7.9 years)	Fremantle Knee Awareness Questionnaire - Japanese version (FreKAQ-J)	Same items as the original FreKAQ-J
	58	bf	Viceconti, A.; Geri, T.; De Luca, S.; Maselli, F.; Rossettini, G.; Testa, M.	2022	Italy	Body Perception Distortions Correlate with Neuropathic Features in Italian Fibromyalgic Patients: Findings from a Self-Administered Online Survey	To investigate the prevalence of self-reported body perception distortions (BPD) in Italian people with fibromyalgia through an online survey administered with the help of the associations of patients distributed nationwide.	Descriptive study	854 adults with fibromyalgia (803 female, mean age: 48.1±10.5 years)	Assessment of neuropathic pain in fibromyalgic patients - Italian	((Items paraphrased according to information available in included article and supplementary material)) Do you feel pain or stiffness in the following areas?" _Right shoulder girdle; _Left soulder girdle; _Right arm; _Left arm; Right forearm; _Left forearm; _Right hip (bottom and waist); _Left hip (bottom and waist); _Right thigh; _Left thigh; _Right leg; _Left leg; _Right jaw; _Left jaw; _Chest;…	Online survey created for this study.
	59	bg	Vittersø, A.D.; Buckingham, G.; Ten Brink, A.F.; Halicka, M.; Proulx, M.J.; Bultitude, J.H.	2021a	United Kingdom	Normal manual straight ahead pointing in Complex Regional Pain Syndrome	To assess whether manual straight ahead pointing is impaired in people with CRPS compared to pain-free controls, and to examine the effect of the arm used (side of body; affected/non-dominant, non-affected/dominant) on performance.	Cross-sectional observational study	17 adults with unilateral upper-limb CRPS type 1 (16 female, 14 right-handed, mean age: 53.53±11.67 years, disease duration: 72.65±41.62 months) 18 pain-free controls (17 female, 15 right-handed, mean age: 54.17±12.22 years).	Bath CRPS Body Perception Disturbance Scale (BDPS) Neglect-like symptoms questionnaire (''Neurobehavioral Questionnaire'')	BPDS: Same items as the original scale. Neurobehavioral Questionnaire: Same items as the original scale. Item scoring: 7-point Likert scale.
	60	bh	Pozeg, Polona; Palluel, Estelle; Ronchi, Roberta; Solca, Marco; Al-Khodairy, Abdul-Wahab; Jordan, Xavier; Kassouha, Ammar; Blanke, Olaf	2017	Switzerland	Virtual reality improves embodiment and neuropathic pain caused by spinal cord injury	''To investigate changes in body ownership and chronic neuropathic pain in patients with spinal cord injury (SCI) using multisensory own body illusions and virtual reality (VR).''	Cross-sectional experimental study	20 patients with SCI with paraplegia and 20 healthy control participants (HC)	Cambridge Depersonalisation Scale (CDS) - French Version	Items pertaining to poby perception disturbances: 3. Parts of my body feel as if they didn't belong to me. 8. My body feels very light, as if it were floeating on air. 12. I have the feeling that my hands or feet have become larger or smaller. 20. I cannot feel properly the objects that I touch with my hands, it feels as if it were not me who were touching it. 22. When a part of my body hurts, I …	No validation was undertaken. A forward-backward translation from English to French was later performed and published by Lopez & Elzière (2022). Original scale developed by Sierra & Berrios (2000).
	61	bi	Halicka, M.; Vittersø, A.D.; McCullough, H.; Goebel, A.; Heelas, L.; Proulx, M.J.	2020	United Kingdom	Disputing space-based biases in unilateral complex regional pain syndrome	To examine visuospatial attention, the mental representation of space, and spatially-defined motor function in people with unilateral upper-limb CRPS and pain-free controls.	Cross-sectional observational study	54 adults with upper-limb CRPS (85% female, mean age: 45.94 years [42.65, 49.28], median disease duration: 47 months [37, 65]), 22 pain-free adults (77% female, mean age: 45.95 years [40.23, 51.41])	Bath CRPS Body Perception Disturbance Scale (BDPS)	Same items as the original scale.		(Vittersø et al. 2021a)
	62	bj	Reinersmann, Annika; Landwehrt, Julia; Krumova, Elena K.; Ocklenburg, Sebastian; Gunturkun, Onur; Maier, Christoph	2012	Germany	Impaired spatial body representation in complex regional pain syndrome type 1 (CRPS I)	To assess and compare visual subjective body midline, hand representation and spatial perception in patients with CRPS, patients with upper-limb pain of other origin and pain-free healthy subjects.	Cross-sectional observational study	24 adults with upper-limb CRPS (12 female, mean age 53.4 years [range 34-78 years], disease duration 18.9±18.8 months), 21 adults with upper-limb pain of other origin (12 female, mean age 51.8 years [range 32-71 years], disease duration 52.8±50.1 months), 24 pain-free healthy subjects (12 female, mean age 52.8 years [range 29-76 years]	Neglect-like symptoms questionnaire (''Neurobehavioral Questionnaire''), German version	Same items as the original scale. Item scoring: 7-point Likert scale.		(Vittersø et al. 2021a)
	63	bk	Lewis, J.S.; Kersten, P.; McPherson, K.M.; Taylor, G.J.; Harris, N.; McCabe, C.S.; Blake, D.R.	2010	United Kingdom	Wherever is my arm? Impaired upper limb position accuracy in Complex Regional Pain Syndrome	(a) To determine the degree to which experimental data supports the 'sense' or reported perception of limb-positioning difficulty. (b) To determine whether there is a relationship between limb position accuracy and self-perception of the affected limb.	Cross-sectional observational study	20 adults with upper-limb CRPS type 1 or 2 (15 female, mean age: 45±10.4 years, disease duration: 5.3±3.8 years) 20 pain-free controls (12 female, mean age: 40.5±10.7 years)	Open question about limb position awareness	"On a daily basis, how aware are you of the position of your limbs?"		(Vittersø et al. 2021a)
	64	bl	Vittersø, A.D.; Buckingham, G.; Ten Brink, A.F.; Halicka, M.; Proulx, M.J.; Bultitude, J.H.	2021b	United Kingdom	Characterising sensorimotor adaptation in Complex Regional Pain Syndrome	To investigate sensorimotor adaptation in pathological pain by characterising prism adaptation in people with CRPS affecting one upper-limb relative to pain-free controls.	Cross-sectional observational study	17 adults with upper-limb CRPS type 1 (16 female, mean age: 53.53±11.67 years, disease duration: 72.65±41.62 months), 18 pain-free controls (17 female, mean age: 54.17±12.22 years)	Bath CRPS Body Perception Disturbance Scale (BDPS) Neglect-like symptoms questionnaire (''Neurobehavioral Questionnaire'')	BPDS: Same items as the original scale. Neurobehavioral Questionnaire: Same items as the original scale. Item scoring: 7-point Likert scale.		(Vittersø et al. 2021a)
	65	bm	Bultitude, J.H.; Petrini, K.	2021	United Kingdom	Altered visuomotor integration in complex regional pain syndrome	To evaluate and compare sensorimotor integration in people with CRPS and pain-free controls.	Cross-sectional observational study	22 adults with upper-limb (n=11) or lower-limb (n=11) CRPS (20 female, mean age: 43.8 years, SEM=2.99, disease duration: 47.9 months, SEM=7.7), 24 pain-free controls (20 female, mean age: 33 years, SEM=3.7)	Bath CRPS Body Perception Disturbance Scale (BPDS)	Same items as the original scale.		(Vittersø et al. 2021a)
	66	bn	Förderreuther, S.; Sailer, U.; Straube, A.	2004	Germany	Impaired self-perception of the hand in complex regional pain syndrome (CRPS)	To investigate neglect, extincion, and body-perception in patients suffering from upper-limb complex regional pain syndrome (CRPS).	Cross-sectional observational study	114 adults with upper-limb CRPS (88 female, mean age: 55.4 years [range 17-86 years], average onset of symptoms: 183 days [range 22 days-66 months])	Open question about feeling of foreignness (German)	((Question paraphrased according to information provided by authors in the paper)) What kind of feeling do you have towards your hand? Close-ended follow-up questions (if participants were unsure about the meaning of the first question): Do you perceive your hand as 'ill'? 'Foreign'? 'Clumsy'? 'Unsuitable'? 'Strange'?		(Haslam et al. 2022)
	67	bo	Onan, D.; Gokmen, D.; Ulger, O.	2019	Turkey	The Fremantle neck awareness questionnaire in chronic neck pain patients: Turkish version, validity and reliability study.	To develop the neck-specific Turkish version of FreBAQ, to investigate the psychometric properties of the questionnaire using Rasch analysis and to determine the relationship between impaired awareness and other clinical variables.	Cross-cultural adaptation and psychometric testing	111 adults with chronic (>3 months) neck pain (86 female, median age: 45 years, range 18-65 years).	Fremantle Neck Awareness Questionnaire - Turkish version (FreNAQ-T)	Same items as other versions of the FreNAQ.	Inclusion criteria target people aged 18-65 years, with pain at rest ≥2 on VAS and NDI score of ≥5.	(Yamashita et al. 2021)	Cross-cultural adaptation: forward-backward translation and expert review achieved; Face validity (n=10): deemed good. Rasch analyses performed to evaluate psychometric properties; Differential Item Functioning: no significant differences between subgroups; Item Fit: mean residual = 0.141 (SD 1.089); Person Fit: mean residual = -0.211 (SD 1.173); Testing of local independency and unidimensionalit…
	68	bp	Reinersmann, A.; Haarmeyer, G.H.; Blankenburg, M.; Frettlöh, J. Krumova, E.K.; Ocklenburg, S.; Maier, C.	2010	Germany	Left is where the L is right. Significantly delayed reaction time in limb laterality recognition in both CRPS and phantom limb pain patients	To compare the extent of impaired laterality recognition in two different unilateral pain syndromes (phantom limb pain [PLP] and complex regional pain syndrome [CRPS]).	Cross-sectional observational study	12 adults with upper-limb CRPS (8 female, mean age: 46.5±13.1 years, disease duration: 27±29 months), 12 adults with amputation of the upper extermity and PLP (2 female, mean age: 51.4±10.1 years, disease duration: 167±202 months), 38 pain-free subjects (mean age: 35.7±12.2 years)	Neglect-like symptoms questionnaire (''Neurobehavioral Questionnaire''), German version	Same items as the original scale. Item scoring: 7-point Likert scale.		(Bultitude et al. 2017)
	69	bq	Tajadura-Jimenez, A.; Cohen, H.; Bianchi-Berthouze, N.	2017	United Kingdom	Bodily Sensory Inputs and Anomalous Bodily Experiences in Complex Regional Pain Syndrome: Evaluation of the Potential Effects of Sound Feedback	To investigate the potential value of using sound feedback for altering body-perception disturbances and its related emotional stage and motor behavior in those with CRPS.	Proof-of-principle pilot study	12 adults with upper-limb (n=3), lower-limb (n=8) or both UL and LL CRPS (n=1) (10 female, mean age: 49.0±8.4 years, range of disease duration: 1-17.3 years)	Bath CRPS Body Perception Disturbance Scale (BPDS) Questionnaire on body feelings	BPDS: same items as the original scale. Questionnaire on body feelings: 7 point adjectival response items: 1. Speed: "I feel quick" to "I feel slow" 2. Weight: "I feel light" to "I feel heavy" 3. Strength: "I feel weak" to "I feel strong" 4. Extension: "I feel crouched/stooped" to "I feel elongated/extended" 7-point Likert response items: 5. Agency: "It seems like the sounds I hear are produced b…		(Vittersø et al. 2019)
	70	br	Kooijman, C.M.; Dijkstra, P.U.; Geertzen, J.H.B.; Elzinga, A.; van der Schans, C.P.	2000	The Netherlands	Phantom pain and phantom sensations in upper limb amputees: an epidemiological study	1. To estimate the prevalence and confidence interval of phantom pain and phantom sensations in upper-limb amputees; 2. To investigate factors associated with phantom pain and phantom sensations in upper limb amputees.	Descriptive study	99 adults with upper limb amputation. - Acquired amputation: n=72 (15 female, median age: 44.2 years [inter-quartile range: 35.2-65 years], median time since amputation: 19.1 years [inter-quartile range: 6.4-32.1 years]) - Congenital limb defect: n=27 (13 female, median age: 30.5 years [inter-quartile range: 9.3-52.9 years])	Questionnaire on the phantom-limb, Dutch version	Item relevant to the construct: 10. Which phantom sensations do you experience? (Answers provided for the Left arm and for the Right arm): _Itching; _Movement; _Abnormal shape; _Abnormal position; _Something touching; _Warmth; _Cold; _Electric sensations; _Other (specify).		(Giummarra et al., 2010)
	71	bs	Halicka, M.; Vittersø, A.D.; McCullough, H.; Goebel, A.; Heelas, L.; Proulx, M.J.; Bultitude, J.	2021b	United Kingdom	Prism adaptation treatment for upper-limb complex regional pain syndrome: a double-blind randomized controlled trial	To investigate the effective of prism adaptation (PA) on the reduction of pain and CRPS symptom severity, to identify factors that can predict the CRPS progression over time and/or the response to PA treatment, and to investigate the relationship between neuropsychological abnormalities and clinical signs in CRPS.	Randomized controlled trial	49 adults with upper-limb CRPS were randomized into two groups: - PA treatment: n=23 (83% female, mean age: 47.35 years [range 43.20-51.95 years], CRPS duration: 61.26 months [range 47.15-75.12 months]) - Sham treatment: n=26 (85% female, mean age: 45.31 years [range 39.85-50.85 years], CRPS duration: 52.31 months [range 39.49-66.35 months])	Bath CRPS Body Perception Disturbance Scale (BPDS)	Same items as the original scale.		(Halicka et al., 2021a)
	72	bt	Nishigami, T.; Tanaka, S; Mibu, A.; Imai, R.; Wand, B.M.	2021b	Japan	Knee-related disability was largely influenced by cognitive factors and disturbed body perception in knee osteoarthritis	To explore the existence of subgroups in a cohort of people with knee OA based upon data from multiple pain-related variables and to profite identified clusters acconrding to levels of pain intensity and knee-related disability.	Cross-sectionnal multidimensional profiling	303 adults with knee OA (237 female, mean age: 69.1±99 years, mean pain duration: 19,2±56.3 weeks)	Fremantle Knee Awareness Questionnaire-Japanese version (FreKAQ-J)	Same items as other versions of the FreKAQ.		(Tanaka et al., 2017)
	73	bu	Koumantakis, G.A.; Sifakis, E.; Stathis, P.; Gigourtakis, S.; Tatsios, P.I.; Paraskevopoulos, E.; Moutzouri, M.; Vrouva, S.	2023	Greece	Cross-Cultural Adaptation, Reliability, and Validity of the Greek Version of the Fremantle Shoulder Awareness Questionnaire (FreSHAQ-GR) in Patients with Chronic Shoulder Pain	To conduct a cross-cultural adaptation of the FreSHAQ questionnaire in Greek, to determine its degree of reliability upon repeated administration and its structural validity by conducting exploratory factor analysis, and to determine its association with other shoulder pathology-related questionnaires.	Cross-cultural adaptation and psychometric testing	100 adults with a painful shoulder pathology lasting for more than 3 months (54 female, mean age: 54.37±15.80 years, age range 20-80 years, mean pain duration: 10.17±19.72 months, pain duration range: 3-132 months)	Fremantle Shoulder Awareness Questionnaire-Greek version (FreSHAQ-GR)	Same items as other versions of the FreSHAQ.			Cross-cultural adaptation: forward-backward translation performed and expert review achieved; Structural Validity: EFA revealed a 2-factor solution. A 6-item (items 7,8,9 removed) single factor solution was examined, which explained 61.44% of the total variance; Construct validity: FreSHAQ-GR 9-item score was positively correlated with pain intensity (r=0.54), SPADI-pain (r=0.39), SPADI-functiona…
	74	bv	Kurashima, Y.; Nakamura, T.; Mukaiyama, T.; Hasegawa, K.; Kuruma, H.	2023	Japan	Investigation for Factors Affecting Body Perception Disturbance in Patients with Low Back Pain by Mechanism-Based Classification of Pain: A Cross-Sectional Study	To examine factors that potentially influence body perception disturbance in patients with LBP, based on differences in the machanistic classification of pain.	Cross-sectional observational study	121 adults with low back pain aged between 20-65 years. Participants were classified according to pain mechanism, leading to 3 groups: - Nociceptive pain (n=66, 36 female, mean age: 42.7±10.3 years, symptoms duration: 151.9±485.8 days); - Peripheral neuropathic pain (n=36, 16 female, mean age: 48.7±12.2 years, symptoms duration: 34.8±38.6 days) - Central sensitization pain (n=15, 8 female, mean a…	Fremantle Back Awareness Questionnaire-Japanese version (FreBAQ-J)	Same items as the original scale.
	75	bw	De Schoenmacker, I.; Mollo, A.; Scheuren, P.S.; Sirucek, L.; Brunner, F.; Schweinhardt, P., Curt, A.; Rosner, J.; Hubli, M.	2023	Switzerland	Central sensitization in CRPS patients with widespread pain: a cross-sectional study	To investigate the relationship of different signs of central sensitization with the clinical pain phenotype in terms of the spatial pain extent in patients with CRPS.	Cross-sectional observational study	21 adults with CRPS (17 female, mean age: 44±12 years, pain duration: 35 [6-159] months, n=14 upper-limb CRPS (Hand: n=13, shoulder: n=1), n=7 lower-limb CRPS (foot)) and 20 pain-free controls (14 female, mean age: 45±14 years).	Bath CRPS Body Perception Disturbance Scale-German version (BPDS-D)	Same items as the original scale.
	76	bx	Garcia-Dopico, N.; De La Torre-Luque, A.; Wand, B.M.; Velasco-Roldan, O.; Sitges, C.	2023a	Spain	The cross-cultural adaptation, validity, and reliability of the Spanish version of the Fremantle Back Awareness Questionnaire	To develop a Spanish version of the FreBAQ, the FreBAQ-S, and evaluate its psychometric properties in a group of Spanish-speaking people with CLBP.	Cross-cultural adaptation and psychometric testing	264 adults with chronic (>3 months) non-specific LBP (173 female, mean age: 45.67±11.59 years, pain duration: 97.6±103.3 months) and 128 pain-free controls (94 female, mean age: 39.52±12.66 years).	Fremantle Back Awareness Questionnaire-Spanish version (FreBAQ-S)	Same items as the original scale.			Cross-cultural adaptation: forward-backward translation performed and expert review achieved; Structural validity: CFA supported the unidimensionality (one-factor structure) of the FreBAQ-S; Discriminant validity: FreBAQ-S score was significantly higher for the CLBP group (11.38±7.27) than for the control group (4.98±4.99); Floor/ceiling effects: No participant achieved the maximum score, while 4…
	77	by	Garcia-Dopico, N.; De La Torre-Luque, A.; Sitges, C.; Velasco-Roldan, O.	2023b	Spain	Proprioceptive acuity is core for back awareness in chronic low back pain: Further analysis of the content validity of the Spanish version of the Fremantle Back Awareness Questionnaire	To assess the face/content validity of the Spanish version of the FreBAQ-S among people with and without CLBP, and to explore their suggestions about additional variables involved in back awareness.	Psychometric testing	264 adults with chronic (>3 months) non-specific LBP (173 female, mean age: 45.67±11.59 years, pain duration: 97.6±103.3 months) and 128 pain-free controls (94 female, mean age: 39.52±12.66 years).	Fremantle Back Awareness Questionnaire-Spanish version (FreBAQ-S)	Same items as the original scale.		(Garcia-Dopico et al., 2023a)	Face/content validity - Completeness: 65.53% of CLBP and 90.62% of HC participants deemed that the FreBAQ-S covered the most important aspects of altered back perception, leading to a significant difference between groups for completeness (p<0.01); Comprehensibility: overall, 86.22% of all participants (85.98% for CLBP, 86.71% for HC) found the FreBAQ-S comprehensible (rating of ≥8/10). However, …
	78	bz	Walton, D.M.; Nazari, G.; Bobos, P.; MacDermid, J.	2023	Canada	Exploratory and confirmatory factor analysis of the new region-generic version of Fremantle Body Awareness-General Questionnaire	To report on the properties of a new region-generic version of the FreBAQ called the FreBAQ-general. Structural validity, internal consistency, and convergent valadity against external criteria was evaluated in a sample a Canadian military veterans with chronic pain, and results were compared against those published for the other region-specific versions.	Questionnaire adaptation and psychometric testing	328 veterans (117 female, mean age: 54 years, range 26-84 years) who 'self-identified as having chronic pain (definition left intentionally broad)'. 9 veterans chose tu use the French version of the FreBAQ-general.	Fremantle Body Awareness - General Questionnaire (FreBAQ-general), original English version (6-item) FreBAQ-general, French-Canadian version	Prior to completing the FreBAQ-general online, participants were asked 'on an average day, what is your most painful body part?' Then, items of the FreBAQ-general were phrased based on participants' answer 6 items: 1. My [body part] feels as though it is not part of the rest of my body. 2. I feel as if my [body part] sometimes moves involuntarily, without my control. 3. When performing everyday t…	The French-Canadian translation was performed by a trained bilingual speaker, but has not undergone a fulsome cross-cultural adaptation process.		Structural validity: EFA (n=180, 34.8% female, mean age=52.9 years): initial factor structure including all 9 items explained 47.7% of variance. A 7-item version (items 2 and 8 removed) was tested, which improved the variance explained (54.1%). CFA (n=148, 33.5% female, mean age=55.3 years) of the 7-item version on a single latent construct ('bodily awareness') only partially met the a priori thr…
	79	ca	Brun, Clementine; Pinard, Anne-Marie; McCabe, Candida S.; Mercier, Catherine	2021	Canada	Virtual reality-induced sensorimotor conflict evokes limb-specific sensory disturbances in complex regional pain syndrome	1. To assess whether sensory disturbances evoked by a unilateral sensorimotor conflict are specific to the painful limb and differ according to the Category of sensory disturbances in individuals with a unilateral CRPS compared to healthy controls (HC); 2. To assess the association between clinical characteristics (intensity and duration of pain, proprioceptive deficits, body perception disturban…	Cross-sectional experimental study	10 adults with upper-limb CRPS (90% female, mean age = 51±11 years) and 23 pain-free individuals (91% female, mean age = 43±11 years) participated in this study.	Bath CRPS Body Perception Disturbance Scale (BPDS), French-Canadian version	Same 5 items as the version used by Brun et al. (2018).	The French version of the Bath BPDS has not been validated yet.	Manual search (personal library of MD)
	80	cb	Batalla, M.A.P.; Lewis, J.S.	2024	United Kingdom	Cognitive Multisensory Rehabilitation, a novel approach for Complex Regional Pain Syndrome: case series	We aimed to apply CMR to treat CRPS within our clinical practice. Clinically, we have found promising results in reducing pain and other common features of CRPS, such as Body Perception Disturbances (BPD).	Case series	4 adults with upper- or lower-limb CRPS Type I (3 female, age range: 28-39 years).	Bath CRPS Body Perception Disturbance Scale (BPDS)	Same items as the original scale.
	81	cc	Akl, Shimaa Ahmed; El-Sabbahi, Samir Ahmed; Ewais, Najlaa Fathi	2023	Egypt	Validity and Reliability of the Arabic Version of the Fremantle Back Awareness Questionnaire	To translate, culturally adapt, validate, and investigate the reliability of the Arabic version of the Fremantle Back Awareness Questionnaire (freBAQ-A) for patients with non-specific chronic low back pain (CLBP).	Questionnaire adaptation and psychometric testing	270 patients (149 male, 121 female; mean age: 41.72±7.77 years; age range: 30-59 years) with non-specific CLBP (average duration: 2.8 years, range: 1-6 years).	Fremantle Back Awareness Questionnaire - Arabic version (FreBAQ-A)	Same items as the original scale.			Cross-cultural adaptation: forward-backward translation performed and expert review achieved; Face and content validity: items clarity (face validity) was assessed consecutively by 2 panels of 10 experts (PhD holders in physical therapy) and improvements were made based on experts' suggestions.The 1st and 2nd expert panels rated the clarity index at 83% (80% for 6 items, 90% for 3 items) and 96% …
	82	cd	Halicka, M.; Cousins, O.R.; Ten Brink, A.F.; Vittersø, A.D.; Proulx, M.J.; Bultitude, J.H.	2024	United Kingdom	Reduced Visuospatial Attention in Personal Space is Not Limited to the Affected Limb in Complex Regional Pain Syndrome	We aimed to test the competing hypotheses of whether the visuospatial attentional bias is specific to the personal space of the affected limb or generalizes to the personal space of other parts of the affected side of the body.	Cross-sectional observational study	14 adults with lower-limb CRPS (36% type II; mean age: 44.6 years, range: 38.8-50.8 years; average CRPS duration: 30.2 months, range: 21.2-44.4 months), 14 adults with upper-limb CRPS (all type I; mean age: 51.6 years, range: 41.3-58 years; average CRPS duration: 41.9 months, range: 28.8-70.3 months), and 17 pain-free control participants (mean age: 41.6 years, range: 35.4-50.7 years) participate…	Bath CRPS Body Perception Disturbance Scale (BPDS)	Same items as the original scale.
	83	ce	Koumantakis, G.A.; Nikolai, F.; Kefalaki, F.; Tatsios, P.I.; Paraskevopoulos, E.; Vrouva, S.	2024	Greece	Cross-Cultural Adaptation, Reliability, and Validity of the Greek Version of the Fremantle Neck Awareness Questionnaire (freNAQ-GR) in Patients with Chronic Neck Pain	The aim of the study was to cross-culturally adapt the Fremantle Neck Awareness Questionnaire (FreNAQ) in Greek and to test its psychometric properties.	Questionnaire adaptation and psychometric testing	104 adults (65 female, mean age: 44.0±11.7 years) with non-specific chronic neck pain (average pain duration: 17.4±27.6 months) participated in this study.	Fremantle Neck Awareness Questionnaire - Greek version (FreNAQ-GR)	9-item version and 6-item version (without items 7-9): 1. My neck feels as though it is not part of the rest of my body 2. I need to focus all my attention on my neck to make it move the way I want it to 3. I feel as if my neck sometimes moves involuntarily, without my control 4. When performing everyday tasks,I do not know how much my neck is moving 5. When performing everyday tasks, I am not su…			Cross-cultural adaptation: forward -backward translation performed and expert review achieved; Floor/ceiling effects: no floor or ceiling effects were observed for the FreNAQ total score; Construct validity - structural validity: Factor analysis for the 9-item solution showed very low communalities for items 7-9, therefore these items were removed. For the 6-item solution, the PAF method revealed…
	84	cf	Monticone, Marco; Maurandi, Carolina; Porcu, Elisa; Arippa, Federico; Wand, Benedict M.; Corona, Giorgio	2024	Italy	The Fremantle Back Awareness Questionnaire: cross-cultural adaptation, reliability, and validity of the Italian version in people with chronic low back pain	The purpose of this research was to develop a FreBAQ-I and examine its psychometric properties in Italians suffering from chronic LBP.	Questionnaire adaptation and psychometric testing	100 adults with chronic non-specific low-back pain (37 male, mean age: 52.96±15.63 years; average pain duration: 49±80 months) participated in this study.	Fremantle Back Awareness Questionnaire - Italian version (FreBAQ-I)	Same items as the original scale.			Cross-cultural adaptation: forward-backward translation performed and expert review achieved; Construct validity - Structural validity: all 9 items fitted the Rasch model. Mean person ability: -0.97 (range: -3.06 to 3.34). Item reliability: 0.96. Person reliability: 0.75. The PCAr showed that FreBAQ was unidimensional: the measured variable explained 50.3% of the total variance; Construct validit…
	85	cg	Świdrak, Justyna; Arias, Ana; de la Calle, Edgar Rodriguez; Cruz, Antonio Collado; Sanchez-Vives, Maria V.	2023	Spain	Virtual embodiment in fibromyalgia	The aim was to evaluate whether it is possible for patients with FM to experience being embodied in a virtual body and then disembodied by observing it progressively becoming invisible. In a second step, we investigated this potential dual role of progressive invisibility in lowering pain treshold (as demonstrated in the pain-free population) while decreasing pain intensity (as demonstrated in pa…	Cross-sectional, exploratory mixed-methods design	21 women with FM (mean age: 43±5 years, range: 36-55 years; average time since diagnosis: 9±12 years) were recruited for this study.	Fremantle Back Awareness Questionnaire - adapted for FM and translated into Spanish	1. My body feels as though it was not part of myself 2. I need to focus all my attention on my body to make it move the way I want it to 3. I feel as if my body sometimes moves involuntarily, without my control 4. When performing everyday tasks, I don't know how my body is moving 5. When performing everyday tasks, I am not sure exactly of my body's position 6. I can't perceive the exact outline o…	The 9 items of the original FreBAQ were adapted to FM by changing the word "back" to "body", and then the items were translated from English to Spanish.	(Świdrak et al., 2024)
	86	ch	Świdrak, J.; Rodriguez, T.; Polino, L.; Arias, A.; Torres, X.; Sanchez-Vives, M.V.	2024	Spain	Drawing the lines of fibromyalgia: a mixed-methods approach to mapping body image, body schema, and emotions in patient subtypes	The objectives of this study are two-fold. On the one hand, we aim to fill the gap in knowledge related to body image and body schema disturbances in FM by combining qualitative and quantitative methods. On the other hand, we explore the heterogeneity and richness of the data on these disturbances to try to identify specific subgroups of women with FM. We focus on how these patients express their…	Cross-sectional, exploratory mixed-methods design	29 women diagnosed with FM (mean age: 48±8 years, range: 27-60 years; average symptoms duration: 9±8 years, range: 1-30 years) participated in this study.	Fremantle Back Awareness Questionnaire - adapted for FM and translated into Spanish	Same version as the one used in (Świdrak et al., 2023).	This version of the FreBAQ is an adaptation performed by the authors for a previous study (see Świdrak et al., 2023). This version has not been validated yet.
	87	ci	Hardy, Amanda; Campbell, Leigh; Jones, Carol; Vandyken, Carolyn; Bond, Jilly; Moss, Penny; Smith, Anne; Wand, Benedict; Thompson, Judith	2024	Australia*, Canada, United Kingdom and United States of America *Ethics approval and corresponding author are based in Australia	The Development and Content Validity of the Fremantle Perineal Awareness Questionnaire (Fre-PAQ) for Use in People With Persistent Perineal Pain	The first aim of this study was to develop a perineal-specific questionnaire to assess body awareness and perception in people with persistent perineal pain (PPP), based on the FreBAQ, reflective of the distinct functional roles of this area and the strong socioemotional elements associated with pain in this region. The second aim was to evaluate the content validity of the new questionnaire by e…	Delphi study, questionnaire development and psychometric testing	Round 1: 135 adults (107 female, mean age of the females: 38.3±12.5 years; 28 male, mean age of the males: 46.8±14.2 years) with persistent perineal pain (pain duration ranging from 0.5 to ≥10 years) participated in the first round. Round 2: 53 adults (46 female, mean age: 41.7±14.7 years) with persistent perineal pain (pain duration ranging from 0.5 to ≥10 years) participated in this study.	Fremantal Perineal Awareness Questionnaire (FrePAQ)	1. I feel disconnected from my perineal area 2. I feel distressed when I look at or think about my perineal area 3. I feel distressed when I touch, am touched, or think about being touched in my perineal area 4. Using my perineal area takes more conscious effort than I think it should 5. I feel as if the muscles in my perineal area tighten or relax without my control 6. When using my perineal are…			Questionnaire development: after the authors (J.T., C.V., J.B., B.W.) formulated wording options for the FrePAQ, 3 Delphi rounds involving 14 expert panel participants led to the elaboration of the preliminary FrePAQ V1. Content validity-1st round (n=135 participants with PPP): the comprehensibility of the FrePAQ V1 was high (mean score for the intro >93%, mean score for the items > 74%). The com…
